# Supplementary material for: Association of variants in the KIF1A gene with amyotrophic lateral sclerosis
Source: PubMed Central journal article supplement (PMC9597953; doi:10.1186/s40035-022-00320-2), 2022-10-26
Supplement: 40035_2022_320_MOESM1_ESM.pdf [file 40035_2022_320_MOESM1_ESM.pdf]

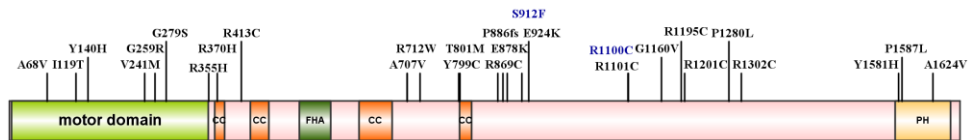

**Figure S1 Schematic representation of the KIF1A protein with the RDVs identified in controls.** Variants identified in controls are depicted above the protein schematic: black indicates variants identified in individuals without neurological disease of East Asian population in the gnomAD database, and blue indicates variants identified in controls of Project Mine. Variants were annotated with reference to the canonical transcript NM\_004321 (p.P886fs was only identified in transcript NM\_001244008). Motor domain (5-354 aa); CC: coiled coil domains, CC1(366-383 aa), CC2(429-462 aa), CC3(622-681 aa), CC4(801-822 aa); FHA: Forkhead associated domain, 516-572 aa; PH: pleckstrin homology domain, 1575-1673 aa. aa: amino acids.

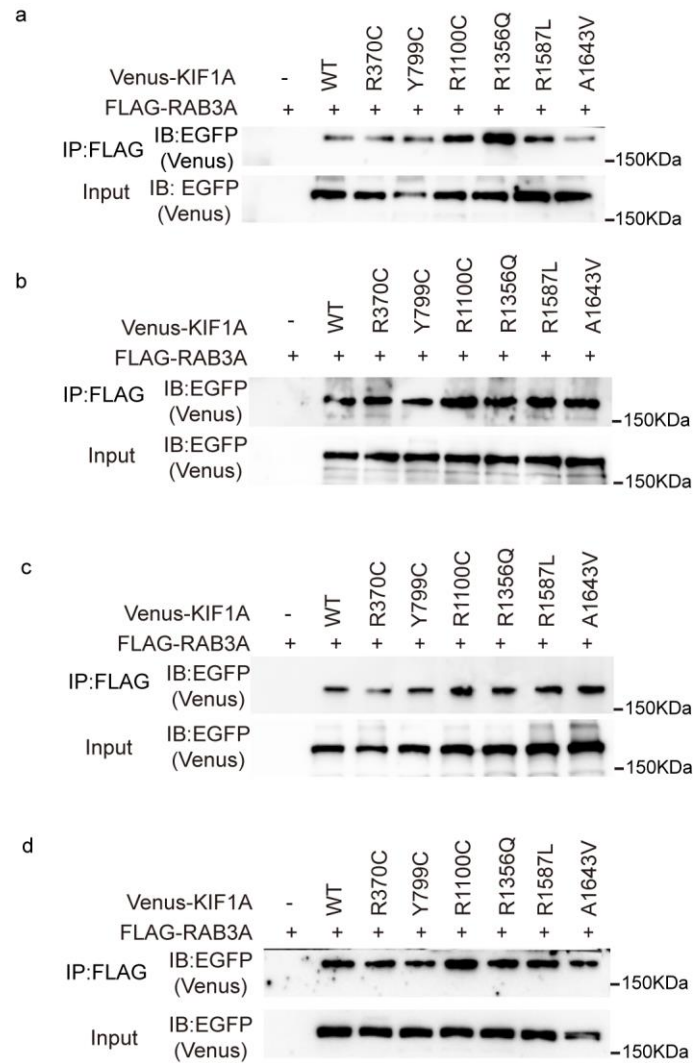

**Figure S2 Interaction between RAB3A and the KIF1A motor. (a-d)** Coimmunoprecipitation of FLAG-RAB3A with different Venus-tagged WT or mutant KIF1A proteins expressed in HEK293T cells. FLAG-RAB3A was immunoprecipitated with a FLAG antibody and probed for EGFP.

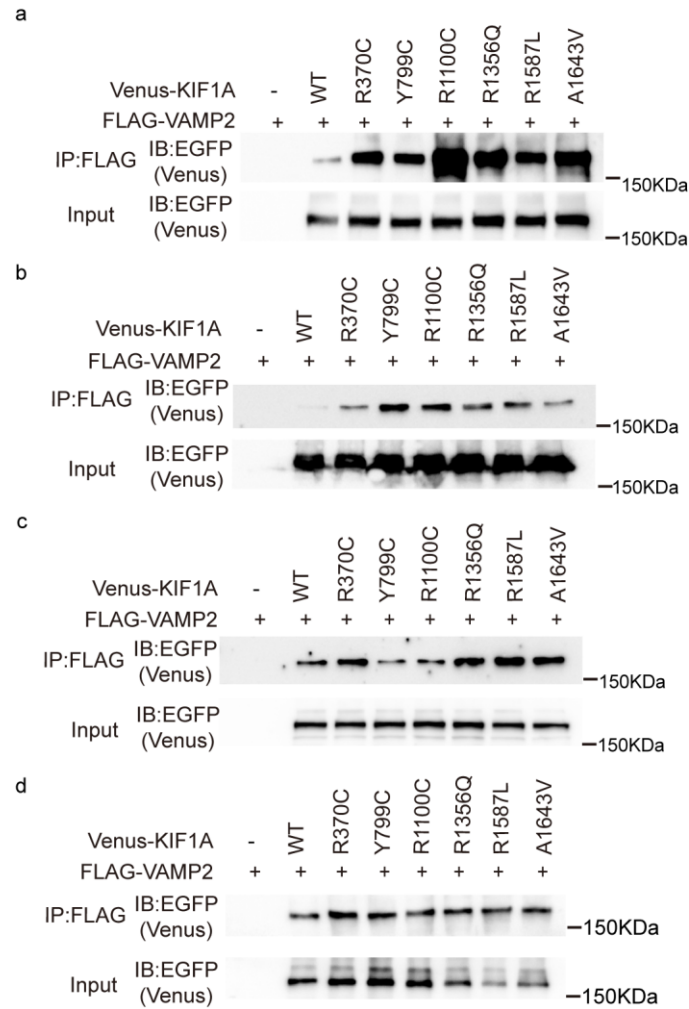

**Figure S3 Interaction between VAMP2 and the KIF1A motor. (a-d)** Coimmunoprecipitation of FLAG-VAMP2 with different Venus-tagged WT or mutant KIF1A proteins expressed in HEK293T cells. FLAG-VAMP2 was immunoprecipitated with a FLAG antibody, and the immunoprecipitants were probed for EGFP.

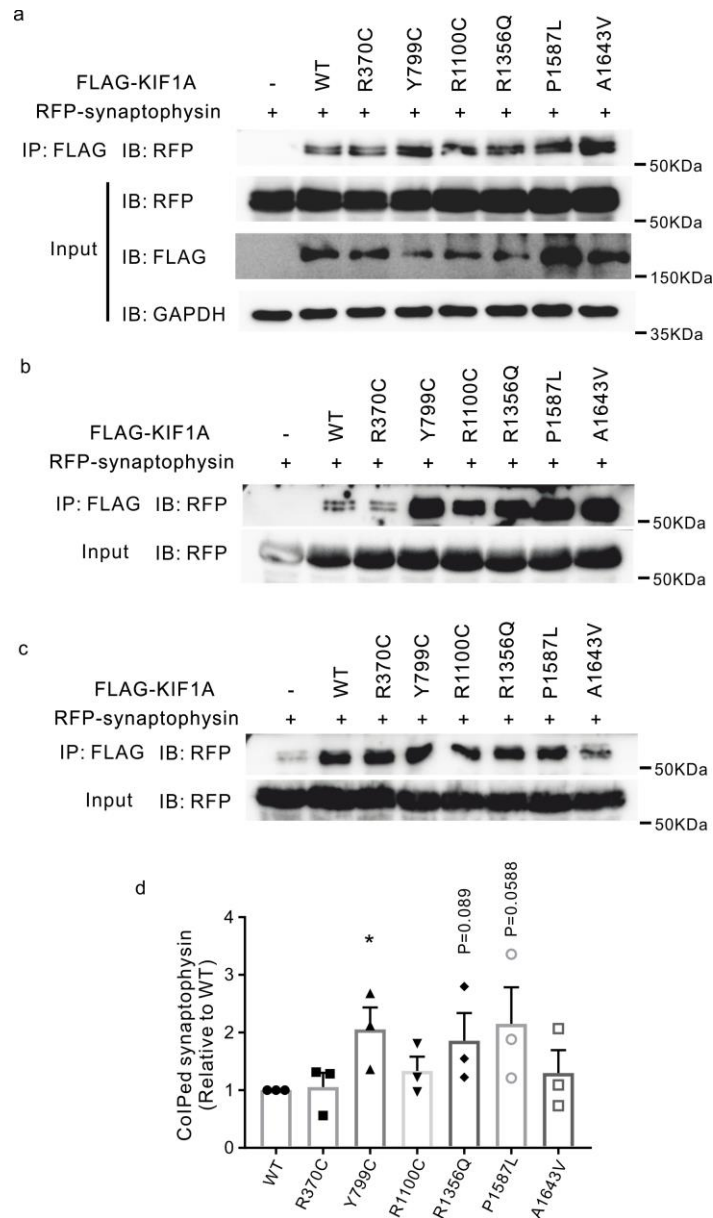

**Figure S4 ALS-associated KIF1A variants alter binding to synaptophysin. (a-c)** HEK293T cells were cotransfected with an RFP-synaptophysin construct, along with a FLAG-tagged WT or mutant KIF1A construct. FLAG-KIF1A was immunoprecipitated with a FLAG antibody, and the immunoprecipitates were blotted for RFP. **(d)** Quantification of IPs in A-C.  $n = 3$  experiments. \* $p < 0.05$  by one-way ANOVA and Dunn's test. Error bars show the SEM.

**Supplementary Table 1 Primers in constructing plasmid**

| <b>Primers</b> | <b>Sequencing (5'-3')</b>                                                 |
|----------------|---------------------------------------------------------------------------|
| KIF1A-FLAG-fwd | agtcaccgtccttgacacgagccaccATGGCCGGGGCTTCGGTG                              |
| KIF1A-FLAG-rev | atgggtgattatgatcaatgttactatcgtcgtcatccttgaatcgccgctgccGACCCGCATCTGGGCAGAC |
| KIF1A_fwd      | agtcaccgtccttgacacgagccaccATGGCCGGGGCTTCGGTG                              |
| KIF1A_rev      | tgccgctgccGACCCGCATCTGGGCAGAC                                             |
| venus_fwd      | gatgcgggtcggcagcggcATGGTGAGCAAGGGCGAG                                     |
| venus_rev      | atgggtgattatgatcaatgTACTTGTACAGCTCGTCCATG                                 |
| mRFP_fwd       | agtcaccgtccttgacacgaagcttgcaccATGGCCTCCTCCGAGGACGTC                       |
| mRFP_rev       | cggaaagccatgccgctgccGGCGCCGGTGGAGTGGCG                                    |
| Rab3a_fwd      | cggcagcggcATGGCTTCCGCCACAGAC                                              |
| Rab3a_rev      | atgggtgattatgatcaatgTCAGCAGGCACAATCCTG                                    |
| Rab3a-EcoR1    | CCGGAATTCAATGGCTTCCGCCACAGACT                                             |
| Rab3a-BamH1    | CGCGGATCCTCAGCAGGCACAATCCTGAT                                             |

Supplementary Table 2 Details of RDVS in the *KIFIA* gene identified in ALS patients and healthy controls

| Sample              | Variant_site       | NO of heterozygous | Transcript (NM_004321)    | Transcript (NM_001244008) | Functional predictions (ReVe) | gnomAD_exome_ALL | gnomAD_exome_ALL_EAS | gnomAD_genome_ALL | gnomAD_genome_EAS | gnomAD_non_neuro_ALL | gnomAD_non_neuro_EAS |
|---------------------|--------------------|--------------------|---------------------------|---------------------------|-------------------------------|------------------|----------------------|-------------------|-------------------|----------------------|----------------------|
| A331                | chr2-241656789-G-A | 1                  | exon46:c.C5065T;p.R1689W  | exon49:c.C5368T;p.R1790W  | 0.809                         | 2.07E-05         | 2.00E-04             | -                 | -                 | -                    | -                    |
| A860                | chr2-241657569-G-A | 1                  | exon46:c.4928C>T;p.A1643V | exon48:c.5231C>T;p.A1744V | 0.72                          | -                | -                    | -                 | -                 | -                    | -                    |
| A737/A893/A342      | chr2-241658574-G-A | 3                  | exon45:c.4760C>T;p.P1587L | exon47:c.5063C>T;p.P1688L | 0.718                         | 2.87E-05         | 2.00E-04             | 6.47E-05          | 6.00E-04          | 1.97E-05             | 7.74E-05             |
| A054                | chr2-241662924-C-T | 1                  | exon40:c.4067G>A;p.R1356Q | exon42:c.4370G>A;p.R1457Q | 0.903                         | 1.30E-05         | -                    | 3.23E-05          | -                 | 1.49E-05             | -                    |
| A707                | chr2-241682369-C-T | 1                  | exon32:c.3314G>A;p.R1105Q | exon34:c.3617G>A;p.R1206Q | 0.275                         | 8.23E-06         | -                    | 3.23E-05          | -                 | 9.87E-06             | -                    |
| A125                | chr2-241682385-G-A | 1                  | exon32:c.3298C>T;p.R1100C | exon34:c.3601C>T;p.R1201C | 0.819                         | 2.90E-05         | -                    | -                 | -                 | 2.48E-05             | -                    |
| A981                | chr2-241700103-T-C | 1                  | exon24:c.2396A>G;p.Y799C  | exon25:c.2423A>G;p.Y808C  | 0.856                         | 9.80E-06         | 1.00E-04             | -                 | -                 | 5.93E-06             | 9.65E-05             |
| A148                | chr2-241712603-G-A | 1                  | exon13:c.1108C>T;p.R370C  | exon13:c.1108C>T;p.R370C  | 0.859                         | 4.06E-06         | -                    | -                 | -                 | 4.85E-06             | -                    |
| ALSdb               | chr2-241657468-G-A | 1                  | exon46:c.5029C>T;p.R1677W | exon48:c.5332C>T;p.R1778W | 0.808                         | 3.01E-05         | -                    | 9.70E-05          | -                 | 2.06E-05             | -                    |
| ALSdb               | chr2-241658533-G-A | 1                  | exon45:c.4801C>T;p.R1601C | exon47:c.5104C>T;p.R1702C | 0.879                         | 4.07E-06         | -                    | -                 | -                 | -                    | -                    |
| ALSdb               | chr2-241658550-C-T | 1                  | exon45:c.4784G>A;p.R1595H | exon47:c.5087G>A;p.R1696H | 0.808                         | 3.26E-05         | -                    | 6.47E-05          | -                 | 4.88E-05             | -                    |
| ALSdb               | chr2-241658551-G-A | 1                  | exon45:c.4783C>T;p.R1595C | exon47:c.5086C>T;p.R1696C | 0.88                          | 2.04E-05         | -                    | -                 | -                 | 2.44E-05             | -                    |
| ALSdb               | chr2-241658593-A-G | 1                  | exon45:c.4741T>C;p.Y1581H | exon47:c.5044T>C;p.Y1682H | 0.754                         | 8.33E-06         | 5.97E-05             | -                 | -                 | 4.99E-06             | 7.85E-05             |
| ALSdb               | chr2-241662933-G-T | 1                  | exon40:c.4058C>A;p.A1353D | exon42:c.4361C>A;p.A1454D | 0.759                         | 6.43E-06         | -                    | -                 | -                 | -                    | -                    |
| ALSdb               | chr2-241666245-C-T | 1                  | exon37:c.3817G>A;p.E1273K | exon39:c.4120G>A;p.E1374K | 0.855                         | 1.26E-05         | -                    | -                 | -                 | 1.51E-05             | -                    |
| ALSdb               | chr2-241676582-C-T | 1                  | exon36:c.3602G>A;p.R1201H | exon38:c.3905G>A;p.R1302H | 0.847                         | 4.06E-05         | -                    | 3.24E-05          | -                 | 3.88E-05             | -                    |
| ALSdb               | chr2-241679756-G-A | 1                  | exon34:c.3472C>T;p.R1158C | exon36:c.3775C>T;p.R1259C | 0.714                         | 8.14E-06         | -                    | -                 | -                 | 9.73E-06             | -                    |
| ALSdb               | chr2-241697823-C-T | 1                  | exon25:c.2509G>A;p.G837R  | exon26:c.2536G>A;p.G846R  | 0.717                         | 1.64E-05         | -                    | 3.23E-05          | -                 | 1.47E-05             | -                    |
| ALSdb               | chr2-241700102-G-C | 1                  | exon24:c.2397C>G;p.Y799X  | exon25:c.2424C>G;p.Y808X  | -                             | 4.91E-06         | -                    | -                 | -                 | -                    | -                    |
| ALSdb               | chr2-241700696-C-T | 1                  | exon23:c.2188G>A;p.A730T  | exon24:c.2215G>A;p.A739T  | 0.808                         | 4.06E-06         | -                    | -                 | -                 | -                    | -                    |
| ALSdb               | chr2-241700764-G-A | 2                  | exon23:c.2120C>T;p.A707V  | exon24:c.2147C>T;p.A716V  | 0.803                         | 6.95E-05         | 3.00E-04             | 3.23E-05          | 6.00E-04          | 7.81E-05             | 2.31E-04             |
| ALSdb               | chr2-241725828-C-G | 1                  | exon6:c.532G>C;p.V178L    | exon6:c.532G>C;p.V178L    | 0.787                         | 4.06E-06         | -                    | -                 | -                 | -                    | -                    |
| ALSdb               | chr2-241727608-G-A | 1                  | exon4:c.223C>T;p.R75W     | exon4:c.223C>T;p.R75W     | 0.768                         | 6.509E-05        | -                    | 3.23E-05          | -                 | 5.35E-05             | -                    |
| Case (Project Mine) | chr2-241657468-G-A | 2                  | exon46:c.5029C>T;p.R1677W | exon48:c.5332C>T;p.R1778W | 0.808                         | 3.01E-05         | -                    | 9.70E-05          | 0                 | 2.06E-05             | -                    |
| Case (Project Mine) | chr2-241657576-T-G | 1                  | exon46:c.4921A>C;p.T1641P | exon48:c.5224A>C;p.T1742P | 0.792                         | -                | -                    | -                 | -                 | -                    | -                    |
| Case (Project Mine) | chr2-241658532-C-T | 1                  | exon45:c.4802G>A;p.R1601H | exon47:c.5105G>A;p.R1702H | 0.848                         | 1.63E-05         | -                    | -                 | -                 | 1.46E-05             | -                    |
| Case (Project Mine) | chr2-241658550-C-T | 1                  | exon45:c.4784G>A;p.R1595H | exon47:c.5087G>A;p.R1696H | 0.808                         | 3.26E-05         | -                    | 6.47E-05          | 0                 | 4.88E-05             | -                    |
| Case (Project Mine) | chr2-241658551-G-A | 1                  | exon45:c.4783C>T;p.R1595C | exon47:c.5086C>T;p.R1696C | 0.88                          | 2.04E-05         | -                    | -                 | -                 | 2.44E-05             | -                    |
| Case (Project Mine) | chr2-241658595-C-G | 1                  | exon45:c.4739G>C;p.G1580A | exon47:c.5042G>C;p.G1681A | 0.83                          | -                | -                    | -                 | -                 | -                    | -                    |

Supplementary Table 2 Details of RDVS in the *KIFIA* gene identified in ALS patients and healthy controls

| Sample              | Variant_site        | NO of heterozygous | Transcript (NM_004321)    | Transcript (NM_001244008)  | Functional predictions (ReVe) | gnomAD_exome_ALL | gnomAD_exome_ALL_EAS | gnomAD_genome_ALL | gnomAD_genome_EAS | gnomAD_non_neuro_ALL | gnomAD_neuro_AL |
|---------------------|---------------------|--------------------|---------------------------|----------------------------|-------------------------------|------------------|----------------------|-------------------|-------------------|----------------------|-----------------|
| Case (Project Mine) | chr2-241664713-T-G  | 1                  | exon38:c.3928A>C:p.S1310R | exon40:c.4231A>C:p.S1411R  | 0.795                         | -                | -                    | -                 | -                 | -                    | -               |
| Case (Project Mine) | chr2-241664727-C-T  | 1                  | exon38:c.3914G>A:p.R1305H | exon40:c.4217G>A:p.R1406H  | 0.724                         | 2.09E-05         | -                    | -                 | -                 | 2.5E-05              | -               |
| Case (Project Mine) | chr2-241676526-G-A  | 1                  | exon36:c.3658C>T:p.L1220F | exon38:c.3961C>T:p.L1321F  | 0.819                         | -                | -                    | -                 | -                 | -                    | -               |
| Case (Project Mine) | chr2-241680714-C-T  | 1                  | exon33:c.3418G>A:p.E1140K | exon35:c.3721G>A:p.E1241K  | 0.866                         | 1.78E-05         | -                    | -                 | -                 | 1.6E-05              | -               |
| Case (Project Mine) | chr2-241682372-G-A  | 1                  | exon32:c.3311C>T:p.P1104L | exon34:c.3614C>T:p.P1205L  | 0.786                         | -                | -                    | 3.23E-05          | 0.0006            | -                    | -               |
| Case (Project Mine) | chr2-241682373-G-A  | 1                  | exon32:c.3310C>T:p.P1104S | exon34:c.3613C>T:p.P1205S  | 0.775                         | -                | -                    | -                 | -                 | -                    | -               |
| Case (Project Mine) | chr2-241683399-G-T  | 1                  | exon31:c.3241C>A:p.Q1081K | exon33:c.3544C>A:p.Q1182K  | 0.726                         | -                | -                    | -                 | -                 | -                    | -               |
| Case (Project Mine) | chr2-241697790-G-A  | 1                  | exon25:c.2542C>T:p.R848W  | exon26:c.2569C>T:p.R857W   | 0.861                         | 4.11E-06         | -                    | -                 | -                 | 4.92E-06             | -               |
| Case (Project Mine) | chr2-241700155-G-A  | 1                  | exon24:c.2344C>T:p.R782C  | exon25:c.2371C>T:p.R791C   | 0.838                         | 8.76E-06         | -                    | -                 | -                 | 1.06E-05             | -               |
| Case (Project Mine) | chr2-241725828-C-T  | 1                  | exon6:c.532G>A:p.V178M    | exon6:c.532G>A:p.V178M     | 0.896                         | 4.06E-06         | -                    | -                 | -                 | 4.86E-06             | -               |
| Case (Project Mine) | chr2-241728727-T-G  | 1                  | exon3:c.109A>C:p.I37L     | exon3:c.109A>C:p.I37L      | 0.755                         | -                | -                    | -                 | -                 | -                    | -               |
| Case (Project Mine) | chr2-241696935-AG-A | 1                  |                           | exon27:c.2658delC:p.P886fs | -                             | 6.76E-06         | 9.28E-05             | .                 | .                 | 8.06E-06             | 1.21E-04        |
| Control             | chr2-241658463-G-A  | 1                  | exon45:c.C4871T:p.A1624V  | exon47:c.C5174T:p.A1725V   | 0.822                         | 4.08E-06         | 5.81E-05             | .                 | .                 | 4.88E-06             | 7.71E-05        |
| Control             | chr2-241658574-G-A  | 1                  | exon45:c.C4760T:p.P1587L  | exon47:c.C5063T:p.P1688L   | 0.718                         | 2.87E-05         | 2.00E-04             | 6.47E-05          | 6.00E-04          | 1.97E-05             | 7.74E-05        |
| Control             | chr2-241658593-A-G  | 1                  | exon45:c.T4741C:p.Y1581H  | exon47:c.T5044C:p.Y1682H   | 0.754                         | 8.33E-06         | 5.97E-05             | .                 | .                 | 4.99E-06             | 7.85E-05        |
| Control             | chr2-241664737-G-A  | 1                  | exon38:c.C3904T:p.R1302C  | exon40:c.C4207T:p.R1403C   | 0.907                         | 1.65E-05         | 5.85E-05             | 3.23E-05          | 0.00E+00          | 1.49E-05             | 7.76E-05        |
| Control             | chr2-241664802-G-A  | 1                  | exon38:c.C3839T:p.P1280L  | exon40:c.C4142T:p.P1381L   | 0.859                         | 1.63E-05         | 5.81E-05             | 3.24E-05          | 0.00E+00          | 1.96E-05             | 7.71E-05        |
| Control             | chr2-241676583-G-A  | 1                  | exon36:c.C3601T:p.R1201C  | exon38:c.C3904T:p.R1302C   | 0.907                         | 1.22E-05         | 5.80E-05             | .                 | .                 | 9.71E-06             | 7.69E-05        |
| Control             | chr2-241679490-G-A  | 1                  | exon35:c.C3583T:p.R1195C  | exon37:c.C3886T:p.R1296C   | 0.72                          | 2.95E-05         | 7.15E-05             | 6.46E-05          | 6.00E-04          | 3.49E-05             | 9.25E-05        |
| Control             | chr2-241679749-C-A  | 1                  | exon34:c.G3479T:p.G1160V  | exon36:c.G3782T:p.G1261V   | 0.917                         | 4.07E-06         | 5.80E-05             | .                 | .                 | 4.87E-06             | 7.70E-05        |
| Control             | chr2-241682382-G-A  | 2                  | exon32:c.C3301T:p.R1101C  | exon34:c.C3604T:p.R1202C   | 0.802                         | 2.90E-05         | 2.00E-04             | .                 | .                 | 1.99E-05             | 1.56E-04        |
| Control             | chr2-241685585-C-T  | 3                  | exon28:c.G2770A:p.E924K   | exon30:c.G3073A:p.E1025K   | 0.751                         | 1.82E-05         | 3.00E-04             | .                 | .                 | 2.11E-05             | 3.23E-04        |
| Control             | chr2-241689888-C-T  | 1                  | exon26:c.G2632A:p.E878K   | exon28:c.G2935A:p.E979K    | 0.822                         | 4.06E-06         | 5.80E-05             | .                 | .                 | 4.86E-06             | 7.70E-05        |
| Control             | chr2-241689915-G-A  | 1                  | exon26:c.C2605T:p.R869C   | exon28:c.C2908T:p.R970C    | 0.876                         | 1.22E-05         | 5.80E-05             | 6.46E-05          | 0.00E+00          | 1.46E-05             | 7.69E-05        |
| Control             | chr2-241696935-AG-A | 1                  |                           | exon27:c.2658delC:p.P886fs | -                             | 6.76E-06         | 9.28E-05             | .                 | .                 | 8.06E-06             | 1.21E-04        |
| Control             | chr2-241700097-G-A  | 1                  | exon24:c.C2402T:p.T801M   | exon25:c.C2429T:p.T810M    | 0.864                         | 2.06E-05         | 2.00E-04             | .                 | .                 | 1.87E-05             | 1.03E-04        |
| Control             | chr2-241700103-T-C  | 1                  | exon24:c.A2396G:p.Y799C   | exon25:c.A2423G:p.Y808C    | 0.856                         | 9.80E-06         | 1.00E-04             | .                 | .                 | 5.93E-06             | 9.65E-05        |
| Control             | chr2-241700750-G-A  | 1                  | exon23:c.C2134T:p.R712W   | exon24:c.C2161T:p.R721W    | 0.839                         | 4.07E-06         | 5.80E-05             | 1.00E-04          | 0.00E+00          | 4.86E-06             | 7.70E-05        |
| Control             | chr2-241700764-G-A  | 3                  | exon23:c.C2120T:p.A707V   | exon24:c.C2147T:p.A716V    | 0.803                         | 6.95E-05         | 3.00E-04             | 3.23E-05          | 6.00E-04          | 7.81E-05             | 2.31E-04        |

Supplementary Table 2 Details of RDVS in the *KIF1A* gene identified in ALS patients and healthy controls

| Sample               | Variant_site       | NO of heterozygous | Transcript (NM_004321)    | Transcript (NM_001244008) | Functional predictions (ReVe) | gnomAD_exome_ALL | gnomAD_exome_ALL_EAS | gnomAD_genome_ALL | gnomAD_genome_EAS | gnomAD_non_neuro_ALL | gnomAD_non_neuro_AL_EAS |
|----------------------|--------------------|--------------------|---------------------------|---------------------------|-------------------------------|------------------|----------------------|-------------------|-------------------|----------------------|-------------------------|
| Control              | chr2-241710465-G-A | 1                  | exon14:c.C1237T;p.R413C   | exon15:c.C1264T;p.R422C   | 0.72                          | 2.03E-05         | 5.80E-05             | .                 | .                 | 2.43E-05             | 7.70E-05                |
| Control              | chr2-241712602-C-T | 1                  | exon13:c.G1109A;p.R370H   | exon13:c.G1109A;p.R370H   | 0.804                         | 4.06E-06         | 5.80E-05             | .                 | .                 | 4.85E-06             | 7.68E-05                |
| Control              | chr2-241712647-C-T | 1                  | exon13:c.G1064A;p.R355H   | exon13:c.G1064A;p.R355H   | 0.71                          | 2.84E-05         | 1.00E-04             | .                 | .                 | 3.39E-05             | 7.67E-05                |
| Control              | chr2-241722490-C-T | 1                  | exon9:c.G835A;p.G279S     | exon9:c.G835A;p.G279S     | 0.942                         | 4.07E-06         | 5.80E-05             | .                 | .                 | 4.87E-06             | 7.70E-05                |
| Control              | chr2-241723179-C-G | 1                  | exon8:c.G775C;p.G259R     | exon8:c.G775C;p.G259R     | 0.83                          | 5.10E-06         | 7.04E-05             | .                 | .                 | 6.01E-06             | 9.13E-05                |
| Control              | chr2-241723233-C-T | 1                  | exon8:c.G721A;p.V241M     | exon8:c.G721A;p.V241M     | 0.838                         | 4.92E-06         | 6.76E-05             | .                 | .                 | 5.83E-06             | 8.87E-05                |
| Control              | chr2-241726679-A-G | 1                  | exon5:c.T418C;p.Y140H     | exon5:c.T418C;p.Y140H     | 0.924                         | 4.07E-06         | 5.80E-05             | .                 | .                 | 4.87E-06             | 7.70E-05                |
| Control              | chr2-241727475-A-G | 3                  | exon4:c.T356C;p.I119T     | exon4:c.T356C;p.I119T     | 0.994                         | 2.00E-04         | 3.00E-04             | .                 | .                 | 2.69E-04             | 3.72E-04                |
| Control              | chr2-241727628-G-A | 1                  | exon4:c.C203T;p.A68V      | exon4:c.C203T;p.A68V      | 0.897                         | 2.04E-05         | 5.80E-05             | .                 | .                 | 2.92E-05             | 7.70E-05                |
| Control (Project Min | chr2-241686678-G-A | 1                  | exon27:c.2735C>T;p.S912F  | exon29:c.3038C>T;p.S1013F | 0.813                         | -                | -                    | -                 | -                 | -                    | -                       |
| Control (Project Min | chr2-241682385-G-A | 1                  | exon32:c.3298C>T;p.R1100C | exon34:c.3601C>T;p.R1201C | 0.819                         | 2.90E-05         | -                    | -                 | -                 | 2.48E-05             | -                       |



Supplementary Table 3 In-silico pathogenicity predictions for RDVs in the *KIF1A* gene

| Sample              | Variant_site       | SIFT     | Polyphen2_ HDIV | Polyphen2_ HVAR | Mutation Taster | Mutation Assessor | PROVEAN  | VEST3    | MetaSVM   | MetaLR   | M_CAP    | CADD    | Functional predictions: pathogenic (total) |
|---------------------|--------------------|----------|-----------------|-----------------|-----------------|-------------------|----------|----------|-----------|----------|----------|---------|--------------------------------------------|
| A331                | chr2-241656789-G-A | D(0.001) | P(1.0)          | P(0.995)        | D(0.924)        | L(1.5)            | D(-3.45) | D(0.755) | D(0.003)  | T(0.382) | D(0.345) | D(28.5) | 9(11)                                      |
| A860                | chr2-241657569-G-A | D(0.004) | D(0.985)        | P(0.703)        | D(1)            | M(2.615)          | D(-3.06) | D(0.739) | T(-1.029) | T(0.074) | D(0.079) | D(32)   | 9(11)                                      |
| A737/A893/A342      | chr2-241658574-G-A | D(0.049) | D(1)            | D(1)            | D(1)            | M(2.665)          | D(-4.3)  | D(0.647) | T(-1.018) | T(0.095) | D(0.255) | D(31)   | 9(11)                                      |
| A054                | chr2-241662924-C-T | D(0.002) | D(1)            | D(0.987)        | D(1)            | M(2.83)           | D(-3.69) | D(0.78)  | D(0.486)  | D(0.664) | D(0.833) | D(35)   | 11(11)                                     |
| A707                | chr2-241682369-C-T | T(0.327) | D(1)            | D(0.996)        | D(0.916)        | M(2.08)           | T(-0.75) | T(0.142) | T(-0.232) | T(0.452) | D(0.266) | D(23.2) | 6(11)                                      |
| A125                | chr2-241682385-G-A | D(0.007) | D(1)            | D(0.998)        | D(1)            | M(2.65)           | D(-5.91) | D(0.76)  | D(0.11)   | D(0.555) | D(0.352) | D(34)   | 11(11)                                     |
| A981                | chr2-241700103-T-C | D(0.025) | D(0.98)         | P(0.851)        | D(1)            | M(3.03)           | D(-7.54) | D(0.718) | D(0.24)   | D(0.553) | D(0.818) | D(25.5) | 11(11)                                     |
| A148                | chr2-241712603-G-A | D(0)     | D(1)            | D(1)            | D(1)            | H(3.88)           | D(-7.15) | D(0.735) | D(0.519)  | D(0.708) | D(0.737) | D(33)   | 11(11)                                     |
| ALSdb               | chr2-241657468-G-A | D(0.001) | D(1)            | D(0.995)        | D(1)            | M(2.375)          | D(-6.56) | D(0.637) | D(0.201)  | D(0.574) | D(0.573) | D(33)   | 11(11)                                     |
| ALSdb               | chr2-241658533-G-A | D(0)     | D(1)            | D(1)            | D(1)            | M(3.07)           | D(-7)    | D(0.814) | T(-0.866) | T(0.116) | D(0.5)   | D(35)   | 9(11)                                      |
| ALSdb               | chr2-241658550-C-T | T(0.309) | D(1)            | D(1)            | D(1)            | L(0.95)           | T(-1.36) | D(0.833) | T(-0.974) | T(0.124) | D(0.132) | D(31)   | 6(11)                                      |
| ALSdb               | chr2-241658551-G-A | D(0.001) | D(1)            | D(1)            | D(1)            | M(2.82)           | D(-5.69) | D(0.877) | T(-0.761) | T(0.17)  | D(0.421) | D(34)   | 9(11)                                      |
| ALSdb               | chr2-241658593-A-G | D(0)     | D(1)            | D(0.999)        | D(1)            | M(2.44)           | D(-4.04) | D(0.643) | T(-0.847) | T(0.133) | D(0.279) | D(25.9) | 9(11)                                      |
| ALSdb               | chr2-241662933-G-T | T(0.148) | D(0.999)        | D(0.979)        | D(1)            | M(2.615)          | D(-3.35) | D(0.852) | T(-0.486) | T(0.316) | D(0.238) | D(25.9) | 8(11)                                      |
| ALSdb               | chr2-241666245-C-T | T(0.108) | D(0.995)        | P(0.819)        | D(1)            | M(2.045)          | D(-3.31) | D(0.831) | T(-0.264) | T(0.437) | D(0.173) | D(24.8) | 8(11)                                      |
| ALSdb               | chr2-241676582-C-T | D(0.002) | D(1)            | D(1)            | D(1)            | M(2.815)          | D(-4.53) | D(0.702) | D(0.315)  | D(0.595) | D(0.738) | D(34)   | 11(11)                                     |
| ALSdb               | chr2-241679756-G-A | D(0.032) | D(1)            | D(0.956)        | D(1)            | M(2.3)            | D(-2.56) | D(0.642) | T(-0.218) | T(0.414) | D(0.31)  | D(34)   | 9(11)                                      |
| ALSdb               | chr2-241697823-C-T | T(0.101) | D(1)            | D(0.992)        | D(1)            | L(1.27)           | D(-2.94) | D(0.702) | T(-0.124) | T(0.477) | D(0.234) | D(29.3) | 7(11)                                      |
| ALSdb               | chr2-241700102-G-C | -        | -               | -               | -               | -                 | -        | -        | -         | -        | -        | -       | -                                          |
| ALSdb               | chr2-241700696-C-T | D(0.001) | D(0.992)        | P(0.816)        | D(1)            | M(2.955)          | D(-3.51) | D(0.614) | D(0.445)  | D(0.663) | D(0.794) | D(34)   | 11(11)                                     |
| ALSdb               | chr2-241700764-G-A | T(0.139) | P(0.821)        | B(0.285)        | D(1)            | L(1.84)           | D(-2.96) | D(0.67)  | T(-0.223) | T(0.4)   | D(0.398) | D(27)   | 6(11)                                      |
| ALSdb               | chr2-241725828-C-G | D(0)     | D(1)            | D(0.999)        | D(1)            | M(2.31)           | D(-2.56) | D(0.552) | D(0.482)  | D(0.68)  | D(0.652) | D(24.4) | 11(11)                                     |
| ALSdb               | chr2-241727608-G-A | D(0.016) | D(0.978)        | P(0.531)        | D(1)            | M(2.855)          | D(-4.46) | D(0.551) | D(0.46)   | D(0.693) | D(0.251) | D(26.6) | 11(11)                                     |
| Case (Project Mine) | chr2-241657468-G-A | 0.001(D) | 1(D)            | 0.995(D)        | 1(D)            | 2.375(M)          | -6.56(D) | 0.637(D) | 0.201(D)  | 0.574(D) | 0.573(D) | 33(D)   | 11(11)                                     |
| Case (Project Mine) | chr2-241657576-T-G | 0.003(D) | 1(D)            | 0.999(D)        | 1(D)            | 2.81(M)           | -5.2(D)  | 0.755(D) | -1.001(T) | 0.101(T) | 0.317(D) | 26.8(D) | 9(11)                                      |
| Case (Project Mine) | chr2-241658532-C-T | 0(D)     | 1(D)            | 1(D)            | 1(D)            | 3.07(M)           | -4.28(D) | 0.778(D) | -0.866(T) | 0.116(T) | 0.38(D)  | 35(D)   | 9(11)                                      |
| Case (Project Mine) | chr2-241658550-C-T | 0.309(T) | 1(D)            | 1(D)            | 1(D)            | 0.95(L)           | -1.36(T) | 0.833(D) | -0.974(T) | 0.124(T) | 0.132(D) | 31(D)   | 6(11)                                      |
| Case (Project Mine) | chr2-241658551-G-A | 0.001(D) | 1(D)            | 1(D)            | 1(D)            | 2.82(M)           | -5.69(D) | 0.877(D) | -0.761(T) | 0.17(T)  | 0.421(D) | 34(D)   | 9(11)                                      |
| Case (Project Mine) | chr2-241658595-C-G | 0(D)     | 1(D)            | 1(D)            | 1(D)            | 3.17(M)           | -5.38(D) | 0.697(D) | 0.442(D)  | 0.622(D) | 0.643(D) | 26.2(D) | 11(11)                                     |

Supplementary Table 3 In-silico pathogenicity predictions for RDVs in the *KIF1A* gene

| Sample              | Variant_site        | SIFT     | Polyphen2_ HDIV | Polyphen2_ HVAR | Mutation Taster | Mutation Assessor | PROVEAN  | VEST3    | MetaSVM   | MetaLR   | M_CAP    | CADD    | Functional predictions: pathogenic (total) |
|---------------------|---------------------|----------|-----------------|-----------------|-----------------|-------------------|----------|----------|-----------|----------|----------|---------|--------------------------------------------|
| Case (Project Mine) | chr2-241664713-T-G  | 0.12(T)  | 0.859(P)        | 0.491(P)        | 0.994(D)        | 2.25(M)           | -3.19(D) | 0.644(D) | -0.304(T) | 0.343(T) | 0.203(D) | 24.4(D) | 8(11)                                      |
| Case (Project Mine) | chr2-241664727-C-T  | 0.021(D) | 1(D)            | 0.961(D)        | 1(D)            | 2.72(M)           | -4.14(D) | 0.599(D) | 0.109(D)  | 0.51(D)  | 0.343(D) | 34(D)   | 11(11)                                     |
| Case (Project Mine) | chr2-241676526-G-A  | 0.001(D) | 1(D)            | 1(D)            | 1(D)            | 3.185(M)          | -3.66(D) | 0.674(D) | 0.606(D)  | 0.708(D) | 0.839(D) | 31(D)   | 11(11)                                     |
| Case (Project Mine) | chr2-241680714-C-T  | 0.017(D) | 0.988(D)        | 0.475(P)        | 1(D)            | 2.675(M)          | -3.56(D) | 0.786(D) | -0.144(T) | 0.42(T)  | 0.438(D) | 33(D)   | 9(11)                                      |
| Case (Project Mine) | chr2-241682372-G-A  | 0.001(D) | 1(D)            | 0.999(D)        | 1(D)            | 2.585(M)          | -8.04(D) | 0.635(D) | 0.46(D)   | 0.663(D) | 0.623(D) | 24.9(D) | 11(11)                                     |
| Case (Project Mine) | chr2-241682373-G-A  | 0.009(D) | 1(D)            | 0.998(D)        | 1(D)            | 2.585(M)          | -6.5(D)  | 0.622(D) | 0.299(D)  | 0.629(D) | 0.243(D) | 22.9(D) | 11(11)                                     |
| Case (Project Mine) | chr2-241683399-G-T  | 0.004(D) | 0.982(D)        | 0.968(D)        | 1(D)            | 2.195(M)          | -3.3(D)  | 0.528(D) | 0.106(D)  | 0.539(D) | 0.375(D) | 23.7(D) | 11(11)                                     |
| Case (Project Mine) | chr2-241697790-G-A  | 0.002(D) | 1(D)            | 0.993(D)        | 1(D)            | 2.175(M)          | -3.86(D) | 0.838(D) | 0.146(D)  | 0.553(D) | 0.463(D) | 35(D)   | 11(11)                                     |
| Case (Project Mine) | chr2-241700155-G-A  | 0.001(D) | 0.989(D)        | 0.748(P)        | 1(D)            | 2.455(M)          | -6.35(D) | 0.78(D)  | -0.106(T) | 0.458(T) | 0.546(D) | 32(D)   | 9(11)                                      |
| Case (Project Mine) | chr2-241725828-C-T  | 0(D)     | 1(D)            | 1(D)            | 1(D)            | 3.9(H)            | -2.56(D) | 0.79(D)  | 0.901(D)  | 0.822(D) | 0.725(D) | 24.8(D) | 11(11)                                     |
| Case (Project Mine) | chr2-241728727-T-G  | 0.208(T) | 0.231(B)        | 0.808(P)        | 1(D)            | 0.22(N)           | -1.69(T) | 0.578(D) | 0.008(D)  | 0.6(D)   | 0.286(D) | 23.5(D) | 7(11)                                      |
| Case (Project Mine) | chr2-241696935-AG-A | -        | -               | -               | -               | -                 | -        | -        | -         | -        | -        | -       | -                                          |
| Control             | chr2-241658463-G-A  | D(0.01)  | D(1)            | D(0.999)        | D(1)            | L(1.77)           | D(-3.45) | D(0.622) | D(0.253)  | D(0.562) | D(0.65)  | D(32)   | 10(11)                                     |
| Control             | chr2-241658574-G-A  | D(0.049) | D(1)            | D(1)            | D(1)            | M(2.665)          | D(-4.3)  | D(0.647) | T(-1.018) | T(0.095) | D(0.255) | D(31)   | 9(11)                                      |
| Control             | chr2-241658593-A-G  | D(0)     | D(1)            | D(0.999)        | D(1)            | M(2.44)           | D(-4.04) | D(0.643) | T(-0.847) | T(0.133) | D(0.279) | D(25.9) | 9(11)                                      |
| Control             | chr2-241664737-G-A  | D(0)     | D(1)            | D(0.988)        | D(1)            | M(2.83)           | D(-7.34) | D(0.847) | D(0.391)  | D(0.618) | D(0.651) | D(34)   | 11(11)                                     |
| Control             | chr2-241664802-G-A  | T(0.061) | D(1)            | D(1)            | D(1)            | M(2.575)          | D(-8.37) | D(0.948) | T(-0.426) | T(0.334) | D(0.208) | D(23.1) | 8(11)                                      |
| Control             | chr2-241676583-G-A  | D(0)     | D(1)            | D(1)            | D(1)            | L(1.715)          | D(-7.35) | D(0.902) | D(0.049)  | T(0.498) | D(0.702) | D(33)   | 9(11)                                      |
| Control             | chr2-241679490-G-A  | T(0.11)  | D(1)            | D(0.944)        | D(1)            | L(1.85)           | D(-6.25) | D(0.636) | T(-0.246) | T(0.397) | D(0.161) | D(29.7) | 7(11)                                      |
| Control             | chr2-241679749-C-A  | D(0.017) | D(1)            | D(1)            | D(1)            | M(2.595)          | D(-5)    | D(0.916) | D(0.158)  | D(0.544) | D(0.601) | D(33)   | 11(11)                                     |
| Control             | chr2-241682382-G-A  | D(0.004) | D(1)            | D(0.998)        | D(1)            | M(2.56)           | D(-6.26) | D(0.696) | D(0.209)  | D(0.574) | D(0.432) | D(34)   | 11(11)                                     |
| Control             | chr2-241685585-C-T  | T(0.327) | D(1)            | D(0.992)        | D(1)            | M(2.105)          | T(-1.28) | D(0.733) | T(-0.479) | T(0.388) | D(0.159) | D(28.2) | 7(11)                                      |
| Control             | chr2-241689888-C-T  | T(0.105) | D(1)            | D(0.992)        | D(1)            | M(2.455)          | D(-3.27) | D(0.779) | T(-0.001) | D(0.524) | D(0.467) | D(35)   | 9(11)                                      |
| Control             | chr2-241689915-G-A  | D(0.001) | D(1)            | D(0.997)        | D(1)            | M(2.67)           | D(-5.94) | D(0.785) | D(0.343)  | D(0.614) | D(0.533) | D(34)   | 11(11)                                     |
| Control             | chr2-241696935-AG-A | -        | -               | -               | -               | -                 | -        | -        | -         | -        | -        | -       | -                                          |
| Control             | chr2-241700097-G-A  | D(0.001) | D(0.99)         | P(0.781)        | D(1)            | M(2.34)           | D(-3.45) | D(0.789) | T(-0.082) | T(0.449) | D(0.519) | D(29.3) | 9(11)                                      |
| Control             | chr2-241700103-T-C  | D(0.025) | D(0.98)         | P(0.851)        | D(1)            | M(3.03)           | D(-7.54) | D(0.718) | D(0.24)   | D(0.553) | D(0.818) | D(25.5) | 11(11)                                     |
| Control             | chr2-241700750-G-A  | D(0.006) | D(1)            | D(0.978)        | D(1)            | M(2.695)          | D(-6.15) | D(0.786) | D(0.125)  | D(0.537) | D(0.565) | D(34)   | 11(11)                                     |
| Control             | chr2-241700764-G-A  | T(0.139) | P(0.821)        | B(0.285)        | D(1)            | L(1.84)           | D(-2.96) | D(0.67)  | T(-0.223) | T(0.4)   | D(0.398) | D(27)   | 6(11)                                      |

Supplementary Table 3 In-silico pathogenicity predictions for RDVs in the *KIF1A* gene

| Sample                 | Variant_site       | SIFT     | Polyphen2_ HDIV | Polyphen2_ HVAR | Mutation Taster | Mutation Assessor | PROVEAN  | VEST3    | MetaSVM   | MetaLR   | M_CAP    | CADD    | Functional predictions: pathogenic (total) |
|------------------------|--------------------|----------|-----------------|-----------------|-----------------|-------------------|----------|----------|-----------|----------|----------|---------|--------------------------------------------|
| Control                | chr2-241710465-G-A | T(0.061) | D(1)            | D(0.984)        | D(1)            | M(2.34)           | D(-3.18) | D(0.612) | D(0.073)  | D(0.512) | D(0.272) | D(28.7) | 10(11)                                     |
| Control                | chr2-241712602-C-T | D(0)     | D(1)            | D(1)            | D(1)            | H(3.88)           | D(-4.47) | D(0.663) | D(0.704)  | D(0.694) | D(0.748) | D(34)   | 11(11)                                     |
| Control                | chr2-241712647-C-T | T(0.116) | P(0.839)        | B(0.197)        | D(1)            | M(2.195)          | T(-1.94) | D(0.561) | D(0.175)  | D(0.564) | D(0.172) | D(24)   | 8(11)                                      |
| Control                | chr2-241722490-C-T | D(0.001) | D(1)            | D(0.984)        | D(1)            | M(2.85)           | D(-4.88) | D(0.845) | D(0.968)  | D(0.863) | D(0.755) | D(28.1) | 11(11)                                     |
| Control                | chr2-241723179-C-G | D(0.001) | D(0.996)        | D(0.92)         | D(1)            | M(3)              | D(-6.53) | D(0.824) | D(0.914)  | D(0.833) | D(0.747) | D(27.8) | 11(11)                                     |
| Control                | chr2-241723233-C-T | D(0.001) | D(1)            | D(0.983)        | D(1)            | M(2.02)           | T(-2.34) | D(0.615) | D(0.755)  | D(0.787) | -        | D(30)   | 9(11)                                      |
| Control                | chr2-241726679-A-G | T(0.099) | D(0.999)        | D(0.996)        | D(1)            | M(2.125)          | D(-4.14) | D(0.849) | D(0.149)  | D(0.571) | D(0.498) | D(23.5) | 10(11)                                     |
| Control                | chr2-241727475-A-G | D(0)     | D(1)            | D(1)            | D(1)            | M(2.54)           | D(-4.27) | D(0.972) | D(0.49)   | D(0.66)  | D(0.894) | D(26.8) | 11(11)                                     |
| Control                | chr2-241727628-G-A | D(0.004) | D(1)            | D(1)            | D(1)            | L(1.77)           | D(-2.85) | D(0.78)  | D(0.729)  | D(0.78)  | D(0.638) | D(29.5) | 10(11)                                     |
| Control (Project Mine) | chr2-241682385-G-A | 0.007(D) | 1(D)            | 0.998(D)        | 1(D)            | 2.65(M)           | -5.91(D) | 0.76(D)  | 0.11(D)   | 0.555(D) | 0.352(D) | 34(D)   | 11(11)                                     |
| Control (Project Mine) | chr2-241686678-G-A | 0.052(T) | 1(D)            | 0.979(D)        | 1(D)            | 2.75(M)           | -3.91(D) | 0.69(D)  | -0.166(T) | 0.515(D) | 0.249(D) | 25.2(D) | 9(11)                                      |

Abbreviations: CADD: combined annotation dependent depletion; LR: logistic regression; M-CAP: Mendelian clinically applicable pathogenicity; PolyPhen2 HDIV: polymorphism phenotyping version 2 human diversity; PolyPhen2 HVAR: polymorphism phenotyping version 2 human variation; PROVEAN: Protein Variation Effect Analyzer; SIFT: sorting intolerant from tolerant; SVM: support vector machine; VEST3: Variant Effect Scoring  
Notes: SIFT (D: Damaging; T: Tolerable); PolyPhen2 HDIV (D: Probably\_Damaging; P: Possibly\_Damaging); Polyphen2\_HVAR (D: Probably\_Damaging; P: Possibly\_Damaging; B: Benign); Mutation Taster (D: Disease\_causing); Mutation Assessor (H: High; M: Medium; L: Low; N: Neutral); PROVEAN (D: Damaging; T: Tolerable); VEST3(D: Damaging; T: Tolerable); MetaSVM (D: Damaging; T: Tolerable); MetaLR (D: Damaging; T: Tolerable); M\_CAP (D: Damaging); CADD: (D: Damaging; T: Tolerable)

Supplementary Table 4 Clinical features in ALS patients carrying RDVs in the *KIFIA* gene

| Clinical features               | P 1         | P 2                                         | P 3       | P 4                                          | P 5       | P 6                                                           | P 7                                              | P 8     | P 9                                | P 10      |
|---------------------------------|-------------|---------------------------------------------|-----------|----------------------------------------------|-----------|---------------------------------------------------------------|--------------------------------------------------|---------|------------------------------------|-----------|
| ID                              | A148        | A981                                        | A125      | A707                                         | A054      | A737                                                          | A342                                             | A893    | A860                               | A331      |
| Variation (Amino acid change)   | R370C       | Y799C                                       | R1100C    | R1105Q                                       | R1356Q    | P1587L                                                        | P1587L                                           | P1587L  | A1643V                             | R1689W    |
| Sex                             | M           | M                                           | F         | M                                            | F         | M                                                             | M                                                | M       | M                                  | M         |
| Family history                  | S           | S                                           | S         | AD                                           | S         | S                                                             | S                                                | S       | AD                                 | S         |
| Age at onset (age)              | 59          | 56                                          | 66        | 40                                           | 63        | 59                                                            | 50                                               | 67      | 50                                 | 57        |
| Survival time(months)           | NA#         | 50*                                         | 28*       | > 84                                         | >42       | >56                                                           | 41                                               | 29*     | 32*                                | 9         |
| Site of onset                   | Spinal      | Spinal                                      | Spinal    | Spinal                                       | Spinal    | Spinal                                                        | Spinal                                           | Bulbar  | Spinal                             | Spinal    |
| Weakness                        | UL, neck    | G                                           | G         | LL                                           | G         | G                                                             | G                                                | G       | G                                  | G         |
| Atrophy                         | UL, neck    | G                                           | G         | LL                                           | G         | G                                                             | G                                                | G       | G                                  | G         |
| Muscle fasciculation            | UL, neck    | G                                           | -         | NA                                           | G         | G                                                             | G                                                | G       | G                                  | G         |
| Dysarthria                      | -           | Mi                                          | Mo        | -                                            | Mi        | Mi                                                            | Mo                                               | Se      | Mi                                 | Mi        |
| Dysphagia                       | -           | -                                           | Mi        | -                                            | Mo        | Mi                                                            | Mi                                               | Se      | -                                  | -         |
| Respiratory                     | -           | +                                           | +         | -                                            | +         | +                                                             | -                                                | +       | +                                  | +         |
| Cognition impairment            | NA          | Language dysfunction and memory impairment  | NA        | -                                            | -         | Executive dysfunction and memory impairment                   | -                                                | -       | -                                  | -         |
| Autonomic dysfunction           | NA          | NA                                          | NA        | +                                            | +         | +                                                             | +                                                | NA      | NA                                 | NA        |
| Sensory                         | -           | -                                           | +(pain)   | +(hypoesthesia)                              | +(numb)   | +(pain)                                                       | +(numb)                                          | +(pain) | -                                  | -         |
| Reflexes                        | Hyper(UL)   | Hypo                                        | Hyper     | Hyper                                        | Hyper     | Hyper                                                         | Hyper                                            | Hyper   | Hyper                              | Hypo      |
| Other UMN signs                 | -           | -                                           | -         | Left Babinski signs(+),left Hoffman(+),ankle | -         | Pathological crying and laughing, increased muscle tone of LL | Barbinski sign(+),increased muscle tone          | -       | Increased mus                      | -         |
| Tongue wasted and fasciculation | -           | +                                           | +         | -                                            | -         | +                                                             | -                                                | +       | +                                  | -         |
| Jaw jerk                        | Absent      | Present                                     | Absent    | Present                                      | Present   | Present                                                       | Absent                                           | Absent  | Absent                             | Absent    |
| Neurophysiology                 |             |                                             |           |                                              |           |                                                               |                                                  |         |                                    |           |
| EMG                             | CR(cervial) | OD and CR                                   | OD and CR | OD and CR (lumber)                           | OD and CR | OD and CR                                                     | OD( cervial)                                     | -       | CR( cervial)                       | OD and CR |
| Motor nerve conduction          | -           | Decreased CMAP and MCV of left median nerve | -         | -                                            | -         | -                                                             | Decreased CMAP of median and ulnar nerve         | -       | -                                  | -         |
| Sensory nerve conduction        | -           | -                                           | -         | -                                            | -         | -                                                             | Decreased SNAP and SCV of median and ulnar nerve | -       | Decreased SCV of left median nerve | -         |

Abbreviations: AD: autosomal dominant; CMAP:compound muscle action potential; CR: chronic renervation; F: feamale; G:Global; Hper: hyperreflexia; Hypo:hyporeflexia; LL: lower limbs; M: male; MCV: motor conduction velocity; Mi: Mild; Mo:Moderate; NA: not abailbale; OD:ongoing denervation; S:sporadic; Se:Severe; SCV:sensory conduction velocity; SNAP: sensory nerve action potentia; UL: upper limbs; "#": loss to follow up; "\*": The patient was dead at the time of the study;"+":affected;"-": normal .
